# Supplementary material for: Microstructural Analysis of Whey/Soy Protein Isolate Mixed Gels Using Confocal Raman Microscopy
Source: MDPI journal article supplement (doi:10.3390/foods10092179), 2021-09-14
Supplement: s1 [file s1]

# Supplementary Material

## Microstructural analysis of whey/soy mixed protein gels using confocal Raman microscopy

Laura G. Gómez-Mascaraque\*, Samantha C. Pinho

**Table S1.** Assignments of bands from protein gels

| SPI100     | WPI100     | Identification                                                         |
|------------|------------|------------------------------------------------------------------------|
| 3419, 3284 | 3420, 3283 | H <sub>2</sub> O                                                       |
| 3065       | 3074       |                                                                        |
| 2937       | 2939       | $\nu(-\text{CH}_3)$ , $\nu(-\text{CH}_2)$ , $\nu(-\text{CH})$          |
| 2431       | 2433       |                                                                        |
| 1669       | 1672       | Amide I (C=O stretch, N-H wagging)                                     |
| 1613       | (1624)     |                                                                        |
| -          | 1559, 1523 | (See main manuscript for potential attributions)                       |
| 1455       | 1458       | $\delta(-\text{CH}_3)$ , $\delta(-\text{CH}_2)$ , $\delta(-\text{CH})$ |
| 1250       | 1252       | Amide III                                                              |
| 1005       | 1009       | Phe $\nu$ -ring (Phenylalanine ring breathing)                         |

$\nu$ , stretching;  $\delta$ , deformation; Phe, phenylalanine

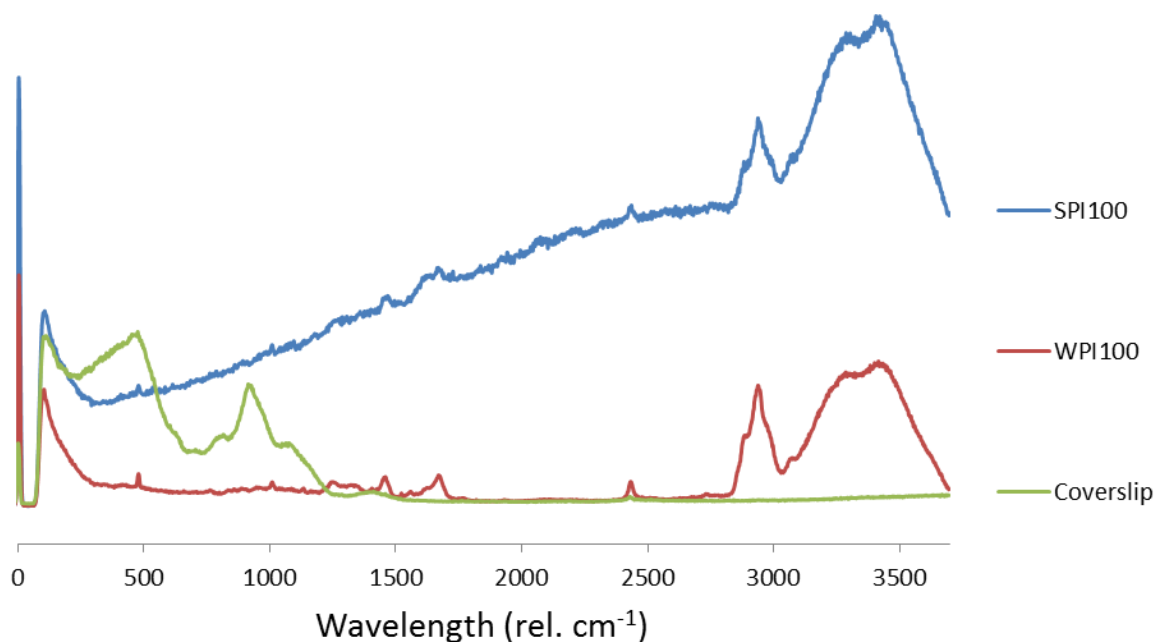

**Figure S1.** Raw Raman spectra of heat-set hydrogels prepared with whey protein isolate (WPI100) and soy protein isolate (SPI100), and of a glass coverslip.

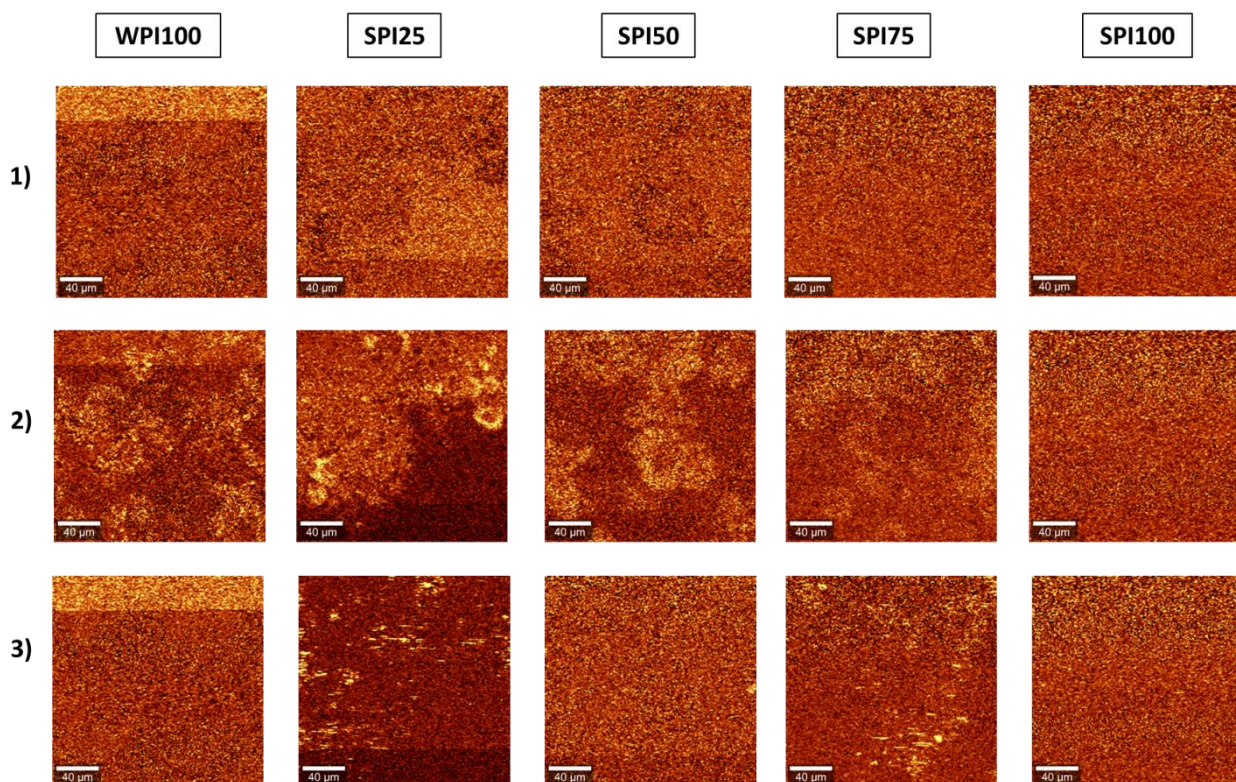

**Figure S2.** Monochromatic Raman images of protein gels obtained through univariate data analysis using filters for the bands centred at 1523 rel.  $\text{cm}^{-1}$  (1), 1559 rel.  $\text{cm}^{-1}$  (2) and 1765 rel.  $\text{cm}^{-1}$  (3). All scale bars correspond to 40  $\mu\text{m}$ .

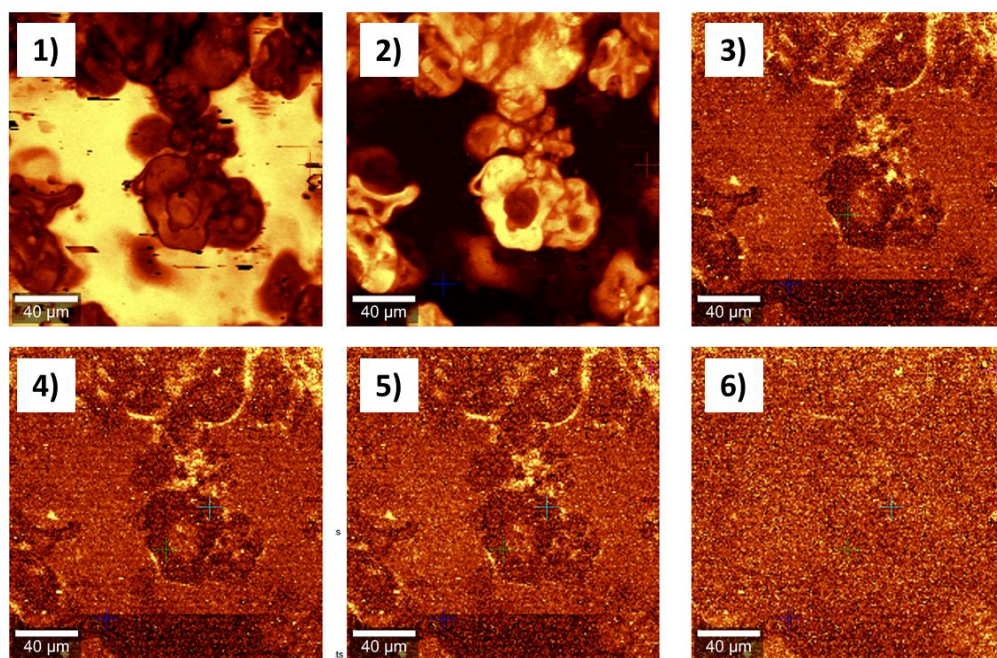

**Figure S3.** Residual images obtained for SPI50 after extracting 1, 2, 3, 4, 5 and 6 components from the dataset using the multivariate analysis method without the input of reference spectra
